# Supplementary material for: Krebs Cycle Intermediate-Modified Carbonate Apatite Nanoparticles Drastically Reduce Mouse Tumor Burden and Toxicity by Restricting Broad Tissue Distribution of Anticancer Drugs
Source: PubMed Central journal article supplement (PMC7017074; doi:10.3390/cancers12010161), 2020-01-09
Supplement: cancers-12-00161-s001.pdf [file cancers-12-00161-s001.pdf]

**Supplementary Table 1.** Organ distribution of free DOX, DOX-loaded CA NPs, DOX-loaded CMCA NPs, and DOX-loaded  $\alpha$ -KAMCA NPs at 2 h of treatment ( $n = 5$ ).

| <b>Organs</b> | <b>Free DOX (%)</b> | <b>DOX-CA (%)</b> | <b>DOX-CMCA (%)</b> | <b>DOX-<math>\alpha</math>-KAMCA (%)</b> |
|---------------|---------------------|-------------------|---------------------|------------------------------------------|
| <b>Liver</b>  | 0.35                | 1.07              | 0.35                | 0.96                                     |
| <b>Spleen</b> | 0.08                | 0.14              | 0.08                | 0.14                                     |
| <b>Heart</b>  | 0.41                | 0.2               | 0.17                | 0.11                                     |
| <b>Lungs</b>  | 0.08                | 0.08              | 0.08                | 0.08                                     |
| <b>Brain</b>  | 0.13                | 0.42              | 0.28                | 0.25                                     |
| <b>Kidney</b> | 0.42                | 0.2               | 0.37                | 0.22                                     |
| <b>Tumor</b>  | 0.08                | 0.37              | 0.45                | 0.62                                     |

**Supplementary Table 2.** Organ distribution of free DOX, DOX-loaded CA NPs, DOX-loaded CMCA NPs, and DOX-loaded  $\alpha$ -KAMCA NPs at 24 h of treatment ( $n = 5$ ).

| <b>Organs</b> | <b>Free DOX (%)</b> | <b>DOX-CA (%)</b> | <b>DOX-CMCA (%)</b> | <b>DOX-<math>\alpha</math>-KAMCA (%)</b> |
|---------------|---------------------|-------------------|---------------------|------------------------------------------|
| <b>Liver</b>  | 1.38                | 1.19              | 0.35                | 0.36                                     |
| <b>Spleen</b> | 0.08                | 0.14              | 0.09                | 0.08                                     |
| <b>Heart</b>  | 0.62                | 0.4               | 0.17                | 0.11                                     |
| <b>Lungs</b>  | 0.08                | 0.08              | 0.08                | 0.08                                     |
| <b>Brain</b>  | 0.47                | 0.6               | 0.4                 | 0.25                                     |
| <b>Kidney</b> | 0.42                | 0.32              | 0.37                | 0.16                                     |
| <b>Tumor</b>  | 0.08                | 0.23              | 0.3                 | 0.4                                      |

**Supplementary Table 3.** Estimation of serum drug concentration following an intravenous injection of free DOX, DOX-CA NPs, DOX-CMCA NPs, and DOX- $\alpha$ -KAMCA NPs ( $n = 5$ ).

| <b>Formulations</b>                  | <b>2 h (%)</b> | <b>24 h (%)</b> |
|--------------------------------------|----------------|-----------------|
| <b>Free DOX</b>                      | 2.02           | 1.71            |
| <b>DOX-CA</b>                        | 9.83           | 5.93            |
| <b>DOX-CMCA</b>                      | 6.19           | 4.33            |
| <b>DOX-<math>\alpha</math>-KAMCA</b> | 16.02          | 8.04            |

**Supplementary Table 4.** Weight of different organs of mice from tumor-bearing untreated mice group, only DOX-treated group, and DOX-loaded NP-treated group ( $n = 5$ ).

| <b>Organs</b> | <b>Tumor-bearing untreated group (mg)</b> | <b>DOX-treated group (mg)</b> | <b>DOX-loaded NP-treated group (mg)</b> |
|---------------|-------------------------------------------|-------------------------------|-----------------------------------------|
| <b>Liver</b>  | 1102                                      | 1102                          | 1102                                    |
| <b>Spleen</b> | 509                                       | 509                           | 509                                     |
| <b>Heart</b>  | 116                                       | 116                           | 116                                     |
| <b>Lungs</b>  | 187                                       | 187                           | 187                                     |
| <b>Brain</b>  | 355                                       | 355                           | 355                                     |
| <b>Kidney</b> | 230                                       | 230                           | 230                                     |
| <b>Tumor</b>  | 181                                       | 181                           | 181                                     |
